# Supplementary material for: Systematic bioinformatic analysis of nutrigenomic data of flavanols in cell models of cardiometabolic disease
Source: Royal Society of Chemistry journal article supplement (doi:10.1039/d0fo00701c), 2020-01-01
Supplement: d0fo00701c1.xlsx [file d0fo00701c1.xlsx]

## Sheet: Data extraction (except the IC)
No	First Author	Title	Year	Paper ID (PMID or WoS)	Cell type	Cells - detailed description	Challenge	Associated disease	Cell function evaluated	Compound/s	Single compound or mix	Concentration	Extract from fruit or vegetable	Number of genes studied	Number of differentially expressed genes	Differentially expressed gene; p<0.05	Modulation (Up/Down)	Full name of the differentially expressed gene	Species
1	Chan, C. Y.	(-)-Epigallocatechin-3-gallate blocks 3T3-L1 adipose conversion by inhibition of cell proliferation and suppression of adipose phenotype expression	2011	21978785	adipocytes	3T3-L1, a fibroblast-like cell line derived from mouse that under appropriate conditions differentiate into adipocyte-like cells sensitive to lipogenic and lipolytic hormones and is able to increase the synthesis and accumulation of triglycerides	adipogenic cocktail (insulin, dexamethasone, 3-isobutyl-1-methylxanthine)	Obesity	Preadipocyte proliferation and differentiation	EGCG	single	10 μM	no	2	2	Cebpa	Down	CCAAT/enhancer binding protein (C/EBP), alpha	mouse
												10 μM				Pparg	Down	peroxisome proliferator activated receptor gamma
2	Cheng, X. W.	Green tea catechins inhibit neointimal hyperplasia in a rat carotid arterial injury model by TIMP-2 overexpression	2004	15158152	smooth muscle cells	RSMCs, smooth muscle cells explanted directly from media of rat aorta	NO	CVD / atherosclerosis	Arterial remodeling	EGCG	single	0.1-10 μM	no	2	1	Timp2	Up	TIMP metallopeptidase inhibitor 2	rat
3	Chokor, R.	Transcriptional targeting of sphingosine-I-phosphate receptor SIP2 by epigallocatechin-3-gallate prevents sphingosine-I-phosphate-mediated signaling in macrophage-differentiated HL-60 promyelomonocytic leukemia cells	2014	24855377	immune cells	Macrophages derived from differentiation of the HL 60 cells, a human cell line derived from the peripheral blood lymphocytes of a woman suffering from acute promyelocytic leukemia	PMA, phorbol-12-myristate-13-acetate, an activator of PKC	Inflammation	Cell differentiation	EGCG	single	3-10 μM	no	3	1	S1PR2	Down	sphingosine-1-phosphate receptor 2	human
4	Hong, M. H.	(-)-Epigallocatechin-3-gallate inhibits monocyte chemotactic protein-1 expression in endothelial cells via blocking NF-kappaB signaling	2007	17379255	endothelial cells	ECV304, an immortalized endothelial cell line derived from umbilical vein endothelial HUVEC. More recently, it has been identified as a derivative of a human urinary bladder carcinoma T24 cell line. Nonetheless, ECV304 cells present many features of typical endothelial cells.	PMA, phorbol-12-myristate-13-acetate, an activator of PKC	CVD / atherosclerosis	Inflammation and monocyte migration	EGCG	single	10 μM	no	1	1	CCL2	Down	C-C motif chemokine ligand 2	human
5	Hwang, K. C.	Epigallocatechin-3-gallate inhibits basic fibroblast growth factor - Induced intracellular signaling transduction pathway in rat aortic smooth muscle cells	2002	11791013	smooth muscle cells	RSMCs, smooth muscle cells explanted directly from media of rat aorta	bFGF, basic fibroblast growth factor	CVD / atherosclerosis	Cell proliferation and migration	EGCG	single	10 μM	no	1	1	Jun	Down	Jun proto-oncogene, AP-1 transcription factor subunit	rat
6	Pasten, C.	Polyphenols downregulate PAI-1 gene expression in cultured human coronary artery endothelial cells: molecular contributor to cardiovascular protection	2007	17379280	endothelial cells	Primary human coronary artery endothelial cells (HCAECs)	NO	CVD / atherosclerosis	Effect of polyphenols on p38, JNK, and ERK1/2 MAPK activation. Effects of MAPKs inhibitors on PAI-1 gene transcription. Effects of polyphenols on PAI-1 gene promoter.	Catechin	single	0.1-10 μM	no	1	1	SERPINE1	Down	Serpin Family E Member 1	human
7	Peng, N.	Epigallocatechin-3-gallate inhibits interleukin-6- and angiotensin II-induced production of C-reactive protein in vascular smooth muscle cells	2010	20100497	smooth muscle cells	VSMC, vascular smooth muscle cells isolated from thoracic aorta of Sprague-Dawley rats	IL-6	CVD / atherosclerosis	Inflammation and oxidation	EGCG	single	3-10 μM	no	1	1	Crp	Down	C-reactive protein	rat
							angiotensin II	CVD / atherosclerosis	Inflammation and oxidation	EGCG	single	1-10 μM	no	1	1	Crp	Down	C-reactive protein
8	Perez-de-Arce, K.	Reactive oxygen species mediates homocysteine-induced mitochondrial biogenesis in human endothelial cells: modulation by antioxidants	2005	16259958	endothelial cells	HUVEC, primary endothelial cells isolated from the human umbilical vein by collagenase digestion	homocysteine	CVD / atherosclerosis	Oxidation, mitochondrial mass	Catechin	single	10 μM	no	3	3	NRF1	Down	nuclear respiratory factor 1	human
												10 μM				TFAM	Down	transcription factor A, mitochondrial
												10 μM				MT-CO3	Down	mitochondrially encoded cytochrome c oxidase III
9	Pullikotil, P.	Epigallocatechin gallate induces expression of heme oxygenase-1 in endothelial cells via p38 MAPK and Nrf-2 that suppresses proinflammatory actions of TNF-alpha	2012	22137262	endothelial cells	HAEC, primary endothelial cells isolated from human aorta	NO	CVD / atherosclerosis	Inflammation and oxidation	EGCG	single	2.5-10 μM	no	3	2	EDN1	Down	endothelin 1	human
												2.5-10 μM				HMOX1	Up	heme oxygenase 1
10	Reiter, C. E. N.	Green Tea Polyphenol Epigallocatechin Gallate Reduces Endothelin-1 Expression and Secretion in Vascular Endothelial Cells: Roles for AMP-Activated Protein Kinase, Akt, and FOXO1	2010	19887561	endothelial cells	HAEC, primary endothelial cells isolated from human aorta	NO	CVD / atherosclerosis	Vasodilation	EGCG	single	10 μM	no	1	1	EDN1	Down	endothelin 1	human
11	Rodriguez, S. K.	Green tea catechin, epigallocatechin-3-gallate, inhibits vascular endothelial growth factor angiogenic signaling by disrupting the formation of a receptor complex	2006	16217757	endothelial cells	HUVEC, primary endothelial cells isolated from the human umbilical vein	vascular endothelial growth factor	CVD / atherosclerosis	Angiogenesis	EGCG	single	0.5-10 μM	no	1	1	CXCL8	Down	C-X-C motif chemokine ligand 8	human
12	Vazquez-Prieto, M. A.	(-)-Epicatechin prevents TNFalpha-induced activation of signaling cascades involved in inflammation and insulin sensitivity in 3T3-L1 adipocytes	2012	22425757	adipocytes	3T3-L1, a fibroblast-like cell line derived from mouse that under appropriate conditions differentiate into adipocyte-like cells sensitive to lipogenic and lipolytic hormones and is able to increase the synthesis and accumulation of triglycerides	TNF	Obesity	Inflammation and insulin signaling	Epicatechin	single	0.5-10 μM	no	4	4	Il6	Down	interleukin 6	mouse
												0.5-10 μM				Ccl2	Down	chemokine (C-C motif) ligand 2
												0.5-10 μM				Retn	Down	resistin
												0.5-10 μM				Tnf	Down	tumor necrosis factor
13	Vezina, A.	EGCG targeting efficacy of NF-kappaB downstream gene products is dictated by the monocytic/macrophagic differentiation status of promyelocytic leukemia cells	2012	22707304	immune cells	HL-60, human leukemia cell line	PMA, phorbol-12-myristate-13-acetate, an activator of PKC	Inflammation	Cell differnetation	EGCG	single	3 μM	no	2	2	MMP9	Down	matrix metallopeptidase 9	human
												3 μM				PTGS2	Down	prostaglandin-endoperoxide synthase 2
14	Wang, C. J.	(-)-Epigallocatechin gallate inhibits endothelin-1-induced C-reactive protein production in vascular smooth muscle cells	2010	20346058	smooth muscle cells	VSMC, vascular smooth muscle cells isolated from thoracic aorta of Sprague-Dawley rats	endothelin 1	CVD / atherosclerosis	Inflammation and oxidation	EGCG	single	3-10 μM	no	1	1	Crp	Down	C-reactive protein	rat
15	Wang, Z. M.	Green tea polyphenol epigallocatechin-3-gallate inhibits TNF-alpha-induced production of monocyte chemoattractant protein-1 in human umbilical vein endothelial cells	2014	24852948	endothelial cells	HUVEC, primary endothelial cells isolated from the human umbilical vein	TNF	CVD / atherosclerosis	Monocyte-endothelial cell adhesion	EGCG	single	10 μM	no	1	1	CCL2	Down	C-C motif chemokine ligand 2	human
16	Yamagata, K.	Epigallocatechin 3-gallate inhibits 7-ketocholesterol-induced monocyte-endothelial cell adhesion	2013	23567873	endothelial cells	hemangiosarcoma cell line (ISO-HAS)	NO	CVD / atherosclerosis	Monocyte-endothelial cell adhesion and oxidation	EGCG	single	10 μM	no	2	2	ICAM1	Down	intercellular adhesion molecule 1	human
												10 μM				CCL2	Up	C-C motif chemokine ligand 2
17	Yamagata, K.	Epigallocatechin-3-gallate inhibits VCAM-1 expression and apoptosis induction associated with LC3 expressions in TNF alpha-stimulated human endothelial cells	2015	WOS: 000353556300002	endothelial cells	hemangiosarcoma cell line (ISO-HAS)	TNF	CVD / atherosclerosis	Monocyte-endothelial cell adhesion, apoptosis and autophagy	EGCG	single	10 μM	no	6	6	ICAM1	Down	intercellular adhesion molecule 1	human
												10 μM				VCAM1	Down	vascular cell adhesion molecule 1
												10 μM				CCL2	Down	C-C motif chemokine ligand 2
												10 μM				BCL2	Up	BCL2, apoptosis regulator
												10 μM				BAX	Down	BCL2 associated X, apoptosis regulator
												10 μM				CASP9	Down	caspase 9
18	Yan, J.	Green tea catechins ameliorate adipose insulin resistance by improving oxidative stress	2012	22330066	adipocytes	3T3-L1, a fibroblast-like cell line derived from mouse that under appropriate conditions differentiate into adipocyte-like cells sensitive to lipogenic and lipolytic hormones and is able to increase the synthesis and accumulation of triglycerides.	dexamethasone	Metabolic syndrome	Insulin resistance and ROS generation	EGCG	single	1-5 µM	no	2	2	Adipoq	Up	adiponectin, C1Q and collagen domain containing	mouse
												1-5 µM				Retn	Down	resistin
19	Yang, H.	Procyanidin B2 inhibits NLRP3 inflammasome activation in human vascular endothelial cells	2014	25450671	endothelial cells	HUVEC, a primary endothelial cells isolated from the human umbilical vein	LPS and ATP	Inflammation	Inflammasome function and ROS production	Procyanidin B2	single	1-2 µM	no	1	1	NLRP3	Down	NLR family pyrin domain containing 3	human
20	Yang, J.	EGCG attenuates high glucose-induced endothelial cell inflammation by suppression of PKC and NF-kappaB signaling in human umbilical vein endothelial cells	2013	23395866	endothelial cells	HUVEC, a primary endothelial cells isolated from the human umbilical vein	glucose	CVD / atherosclerosis	Vascular inflammation and monocyte adhesion	EGCG	single	10 µM	no	1	1	VCAM1	Down	vascular cell adhesion molecule 1	human
21	Yasuda, A.	Cacao polyphenols influence the regulation of apolipoprotein in HepG2 and Caco2 cells	2011	21226458	hepatocytes	Hep G2, a human liver cancer cell line	NO	CVD / atherosclerosis	Production of apolipoproteins A1 and B; LDL receptor binding	Epicatechin	single	1-10 µM	no	7	5	APOA1	Up	apolipoprotein A1	human
												1-10 µM				APOB	Down	apolipoprotein B
												0.1 µM				LDLR	Up	low density lipoprotein receptor
												0.1-10 µM				ABCA1	Up	ATP binding cassette subfamily A member 1
												10 µM				SREBF1	Up	sterol regulatory element binding transcription factor 1
										Catechin	single	1-10 µM	no	7	7	APOA1	Up	apolipoprotein A1
												0.1 µM				APOB	Down	apolipoprotein B
												0.1 µM and 10 µM				LDLR	Up	low density lipoprotein receptor
												10 µM				SCARB1	Up	scavenger receptor class B member 1
												0.1 µM				ABCA1	Up	ATP binding cassette subfamily A member 1
												0.1-10 µM				SREBF1	Up	sterol regulatory element binding transcription factor 1
												10 µM				SCAP	Up	SREBF chaperone
										Procyanidin B2	single	10 µM	no	7	4	APOA1	Up	apolipoprotein A1
												1-10 µM				APOB	Down	apolipoprotein B
												1.0 µM				LDLR	Up	low density lipoprotein receptor
												10 µM				ABCA1	Up	ATP binding cassette subfamily A member 1
22	Yen, G. C.	Protective effect of pine (Pinus morrisonicola Hay.) needle on LDL oxidation and its anti-inflammatory action by modulation of NOS and COX-2 expression in LPS-stimulated RAW 264.7 macrophages	2008	17804140	immune cells	RAW 264.7, macrophage cell lines transformed by Abelson leukemia virus	LPS	CVD / atherosclerosis	Lipid accumulation and ROS production - effects of the extract only	Epicatechin	single	2 µg/mL	no	2	2	Nos2	Down	nitric oxide synthase 2, inducible	mouse
												2 µg/mL				Ptgs2	Down	prostaglandin-endoperoxide synthase 2
23	Lu, L. H.	Epigallocatechin suppression of proliferation of vascular smooth muscle cells: correlation with c-jun and JNK	1998	9720795	smooth muscle cells	A7r5 cells, smooth muscle cells derived from the thoracic aorta of an embryonic BDIX rat	serum	CVD / atherosclerosis	Cell proliferation	Epigallogatechin	single	10 µM	no	3	1	Jun	Down	Jun proto-oncogene, AP-1 transcription factor subunit	rat
24	Marinovic, M. P.	Green tea catechins alone or in combination alter functional parameters of human neutrophils via suppressing the activation of TLR-4/NF kappa B p65 signal pathway	2015	26187476	immune cells	Neutrophils isolated from human peripheral blood	NO	Inflammation	Neutrophils migration, inflammation, oxidation	Epicatechin gallate	single	3 µM	no	8	1	ITGAM	Up	integrin subunit alpha M	human
25	Shin, D. W.	(-)-Catechin promotes adipocyte differentiation in human bone marrow mesenchymal stem cells through PPAR gamma transactivation	2009	18951882	adipocytes	Adipocytes derived from human bone marrow mesenchymal stem cells	adipogenic cocktail (insulin, dexamethasone, 3-isobutyl-1-methylxanthine)	Metabolic Syndrome	Adipocyte differentiation	Catechin	single	10 µM	no	4	4	ADIPOQ	Up	adiponectin, C1Q and collagen domain containing	human
												10 µM				FABP4	Up	fatty acid binding protein 4
												10 µM				LPL	Up	lipoprotein lipase
												10 µM				PPARG	Up	peroxisome proliferator activated receptor gamma
26	Liu, S. H.	Lotus leaf (Nelumbo nucifera) and its active constituents prevent inflammatory responses in macrophages via JNK/NF-kappaB signaling pathway	2014	25004880	immune cells	RAW 264.7, macrophage cell lines transformed by Abelson leukemia virus	LPS	Inflammation	Inflammation	Catechin	single	10 µM	no	2	2	Il6	Down	interleukin 6	mouse
												10 µM				Tnf	Down	tumor necrosis factor
27	Liu, Y.	Epigallocatechin-3-O-gallate, a green tea polyphenol, induces expression of pim-1 kinase via PPARγ in human vascular endothelial cells	2013	23990052	endothelial cells	HUVEC, a primary endothelial cells isolated from the human umbilical vein	NO	CVD / atherosclerosis	Angiogenesis	EGCG	single	10 µM	no	1	1	PIM1	Up	Pim-1 proto-oncogene, serine/threonine kinase	human
28	Wang, Q. M.	Inhibition of EMMPRIN and MMP-9 Expression by Epigallocatechin-3-Gallate through 67-kDa Laminin Receptor in PMA-Induced Macrophages	2016	27832636	immune cells	THP-1, an immortalized monocyte-like cell line derived from the a case of acute monocytic leukemia	PMA, phorbol-12-myristate-13-acetate, an activator of PKC	CVD / atherosclerosis	Expression of proteins with importance in atherosclerotic plaque rupture	EGCG	single	10 µM	no	2	2	MMP9	Down	matrix metallopeptidase 9	human
												10 µM				BSG	Down	basigin (Ok blood group)
29	Oleaga, C.	Cocoa flavanol metabolites activate HNF-3beta, Sp1, and NFY-mediated transcription of apolipoprotein AI in human cells	2013	23293065	hepatocytes	Hep G2, a human liver cancer cell line	NO	CVD / atherosclerosis	Transcriptional regulation of apoA1	Epicatechin	single	10 µM	no	2	2	APOA1	Up	apolipoprotein A1	human
												10 µM				FOXA2	Up	forkhead box A2
										Various flavanol metabolites	single	10 µM	no	2	2	APOA1	Up	apolipoprotein A1
												10 µM				FOXA2	Up	forkhead box A2
30	Schnorr, O.	Cocoa flavanols lower vascular arginase activity in human endothelial cells in vitro and in erythrocytes in vivo	2008	18348861	endothelial cells	HUVEC, a primary endothelial cells isolated from the human umbilical vein	NO	CVD / atherosclerosis	Endothelium dependent vasorelaxation	Epicatechin	single	1-10 µM	no	2	1	ARG2	Down	arginase 2	human
										Flavanol metabolites	mix	0.4-7.8 µM	no	2	1	ARG2	Down	arginase 2
31	Chani, B.	Epigallocatechin Gallate Inhibits Mouse Mesenchymal Stem Cell Differentiation to Adipogenic Lineage	2016	27397998	adipocytes	C3H10T1/2, a mouse mesenchymal stem cell line	adipogenic cocktail (insulin, dexamethasone, 3-isobutyl-1-methylxanthine)	Obesity	Adipogenesis	EGCG	single	1 µM	no	1	1	Cfd	Down	complement factor D (adipsin)	mouse
32	Zhao, J.	Epigallocatechin-3-gallate inhibits angiotensin II-induced C-reactive protein generation through interfering with the AT1-ROS-ERK1/2 signaling pathway in hepatocytes	2016	27492718	hepatocytes	L-02, a human normal liver cell line	angiotensin II	Inflammation	Inflammation and ROS generation	EGCG	single	10 µM	no	3	2	AGTR1	Down	angiotensin II receptor type 1	human
												1-10 µM				PPARG	Up	peroxisome proliferator activated receptor gamma
33	Kumazoe, M.	Green Tea Polyphenol EGCG Upregulates Tollip Expression by Suppressing Elf-1 Expression	2017	28954885	immune cells	RAW 264.7, a macrophage cell lines transformed by Abelson leukemia virus	NO	Inflammation	Regulation of TLR signaling	EGCG	single	2.5 µM	no	2	1	Tollip	Up	toll interacting protein	mouse
34	Kumazoe, M.	Green Tea Polyphenol Epigallocatechin-3-gallate Suppresses Toll-like Receptor 4 Expression via Up-regulation of E3 Ubiquitin-protein Ligase RNF216	2017	28154178	immune cells	Thioglycollate-elicited peritoneal macrophages obtained from male mice	NO	Inflammation	Inflammation	EGCG	single	5 µM	no	2	1	Rnf216	Up	ring finger protein 216	mouse
							palmitic acid	Inflammation	Inflammation	(-)-epigallocatechin-3-O-(3-O-methyl)-gallate	single	1 µM	no	1	1	Tnf	Down	tumor necrosis factor
35	Li, Y. F.	Epigallocatechin-3-Gallate Inhibits Matrix Metalloproteinase-9 and Monocyte Chemotactic Protein-1 Expression Through the 67-kDa Laminin Receptor and the TLR4/MAPK/NF-kappa B Signalling Pathway in Lipopolysaccharide-Induced Macrophages	2017	28957799	immune cells	RAW 264.7, a macrophage cell lines transformed by Abelson leukemia virus	LPS	CVD / atherosclerosis	Inflammation	EGCG	single	1 µM	no	2	2	Mmp9	Down	matrix metallopeptidase 9	mouse
												1 µM				Ccl2	Down	chemokine (C-C motif) ligand 2
36	Hong Byun, E.	TLR4 Signaling Inhibitory Pathway Induced by Green Tea Polyphenol Epigallocatechin-3-Gallate through 67-kDa Laminin Receptor	2010	20511545	immune cells	RAW 264.7, a macrophage cell lines transformed by Abelson leukemia virus	LPS	Inflammation	TLR4 signaling	EGCG	single	1 µM	no	2	2	Tnf	Down	tumor necrosis factor	mouse
												1 µM				Il6	Down	interleukin 6
							NO	Inflammation	TLR4 signaling	EGCG	single	1 µM	no	2	2	Tlr4	Down	toll-like receptor 4
												1 µM				Tollip	Up	toll interacting protein
37	Claude, S.	Flavanol metabolites reduce monocyte adhesion to endothelial cells through modulation of expression of genes via p38-MAPK and p65-Nf-kB pathways	2014	24425450	endothelial cells	HUVEC, a primary endothelial cells isolated from the human umbilical vein	TNF	CVD / atherosclerosis	Monocyte adhesion	Flavanol metabolites	single	1 µM	no	9	9	NFKB1	Up	nuclear factor kappa B subunit 1	human
												1 µM				SELE	Up	selectin E
												1 µM				CCL2	Up	C-C motif chemokine ligand 2
												1 µM				CALD1	Down	caldesmon 1
												1 µM				TJP1	Down	tight junction protein 1
												1 µM				ARHGEF7	Down	Rho guanine nucleotide exchange factor 7
												1 µM				CASK	Down	calcium/calmodulin dependent serine protein kinase
												1 µM				ITGB1	Up	integrin subunit beta 1
												1 µM				ROCK1	Up	Rho associated coiled-coil containing protein kinase 1

## Sheet: Data extraction (Intest. Cells)
No	First Author	Title	Year	Paper ID (PMID or WoS)	Cell type	Cells - detailed description	Challenge	Associated disease	Cell function evaluated	Compound/s	Single compound or mix	Concentration	Extract from fruit or vegetable	Number of genes studied	Number of differentially expressed genes	Differentially expressed gene; p<0.05	Modulation (Up/Down)	Full name of the differentially expressed gene	Species
1	Erlejman, A. G.	TNFalpha-induced NF-kappaB activation and cell oxidant production are modulated by hexameric procyanidins in Caco-2 cells	2008	18275839	intestinal cells	Caco-2, a human epithelial colorectal adenocarcinoma cell line	TNF	Inflammation	Inflammation and oxidation	Mix of proanthocyanidin	mix of compounds	20 μM	yes (hexameric procyanidin fraction)	1	1	NOS2	Down	nitric oxide synthase 2	human
2	Quesada, H.	Proanthocyanidins modulate triglyceride secretion by repressing the expression of long chain acyl-CoA synthetases in Caco2 intestinal cells	2011	WOS: 000294979600023	intestinal cells	Caco-2, a human epithelial colorectal adenocarcinoma cell line	fasted state medium	Metabolic Syndrome	Triglyceride secretion	Mix of proanthocyanidin	mix of compounds	100 mg/L	yes grape seed extract	8	4	ACSL5	Down	acyl-CoA synthetase long chain family member 5	human
												100 mg/L				ACSL3	Down	acyl-CoA synthetase long chain family member 3
												100 mg/L				FABP2	Down	fatty acid binding protein 2
												100 mg/L				PPARA	Down	peroxisome proliferator activated receptor alpha
							postprandial state medium	Metabolic Syndrome	Triglyceride secretion	Mix of proanthocyanidin	mix of compounds	25-100 mg/L	yes grape seed extract	8	2	CPT1A	Up	carnitine palmitoyltransferase 1A
												25-100 mg/L				ACSL5	Down	acyl-CoA synthetase long chain family member 5
3	Yasuda, A.	Cacao polyphenols influence the regulation of apolipoprotein in HepG2 and Caco2 cells	2011	21226458	intestinal cells	Caco-2, a human epithelial colorectal adenocarcinoma cell line	NO	CVD / atherosclerosis	Production of apolipoproteins A1 and B	Cinnamtannin A2	single	1-10 μM	no	2	2	APOA1	Up	apolipoprotein A1	human
												1-10 μM				APOB	Up	apolipoprotein B
4	Gonzalez-Abuin, N.	Grape Seed-Derived Procyanidins Decrease Dipeptidyl-peptidase 4 Activity and Expression	2012	22891874	intestinal cells	Caco-2, a human epithelial colorectal adenocarcinoma cell line	NO	Metabolic Syndrome	Glucose homeostasis	Mix of proanthocyanidin	mix of compounds	100 mg/L	yes grape seed extract	1	1	DPP4	Down	dipeptidyl peptidase 4	human
5	Heidker, R. M.	Dietary procyanidins selectively modulate intestinal farnesoid X receptor-regulated gene expression to alter enterohepatic bile acid recirculation: elucidation of a novel mechanism to reduce triglyceridemia	2016	26718753	intestinal cells	Caco-2, a human epithelial colorectal adenocarcinoma cell line	chenodeoxycholic acid	CVD / atherosclerosis	Triglyceride and cholesterol homeostasis	Mix of proanthocyanidin	mix of compounds	50-100 mg/L	yes grape seed extract	5	5	SLC10A2	Down	solute carrier family 10 member 2	human
												50-100 mg/L				FABP6	Down	fatty acid binding protein 6
												50-100 mg/L				FGF19	Down	fibroblast growth factor 19
												20-100 mg/L				SLC51A	Down	solute carrier family 51 alpha subunit
												20-100 mg/L				SLC51B	Down	solute carrier family 51 beta subunit
